# Supplementary material for: Characterisation of a panel of anti-tetanus toxin single-chain Fvs reveals cooperative binding
Source: PubMed Central journal article supplement (PMC2874839; doi:10.1016/j.molimm.2010.02.020), 2010-06
Supplement: mmc1.pdf [file mmc1.pdf]

Supplementary Table 1.

| <b>Input titre (pfu/ml)</b> | <b>Elution method</b> | <b>Output titre (pfu/ml)</b> | <b>% binders</b> |
|-----------------------------|-----------------------|------------------------------|------------------|
| $3.5 \times 10^{10}$        | Glycine               | $1.2 \times 10^6$            | 9.1              |
|                             | TEA                   | $1.2 \times 10^5$            | 12.5             |
|                             | TG1 cells             | $1.2 \times 10^3$            | 14.8             |
| $5.0 \times 10^{11}$        | Glycine               | $1.7 \times 10^6$            | 38.5             |
|                             | TEA                   | $2.2 \times 10^5$            | 13.6             |
|                             | TG1 cells             | $2.0 \times 10^3$            | 1.1              |
